# Supplementary material for: Rapid Dissemination of Plasmodium falciparum Drug Resistance Despite Strictly Controlled Antimalarial Use
Source: PubMed Central journal article supplement (PMC1764034; doi:10.1371/journal.pone.0000139), 2007-01-03
Supplement: pone.0000139.s001.pdf [file pone.0000139.s001.pdf]

Supplementary file Table S1.

## Sequence of the primers and probes used

### Molecular beacons *Pfcr1 K76T*

|                         |                                    |
|-------------------------|------------------------------------|
| crt sense (170-190)     | 5' TTTAGGTGGAGGTTCTTGTC            |
| crt antisense (368-348) | 5' AATAAAGTTGTGAGTTTCGGA           |
| wild-type beacon K76    | 5' GCGACGTGTAATGAATAAAATTTTTGGTTCG |
| mutant beacon K76T      | 5' GCGACGTGTAATTGAAACAATTTTTGTTCG  |

### Molecular beacons *Pfdhfr-ts S108N*

|                          |                                  |
|--------------------------|----------------------------------|
| dhfr sense (303-326)     | 5' TGTGGATAATGTAAATGATATGCC      |
| dhfr antisense (421-398) | 5' CATTTATCCTATTGCTTAAAGGTT      |
| wild-type beacon S108    | 5' GCGACGAAGAACAAGCTGGGAAAGGTTCG |
| mutant beacon S108N      | 5' GCGACGAAGAACAAGCTGGGAAAGGTTCG |

### *Pfcr1* PCR for exon 2 sequencing

|         |                           |
|---------|---------------------------|
| Crt76-5 | 5' GGTGGAGGTTCTTGCTTGG    |
| Crt76-3 | 5' ATAAAGTTGTGAGTTTCGGATG |

### *Pfcr1* exon 4- exon 5 PCR

|                  |                            |
|------------------|----------------------------|
| CRT220-sense     | 5' TTATACAATTATCTCGGAGCAG  |
| CRT220-antisense | 5' CATGTTTGAAAAGCATAACAGGC |

### *Pfdhfr-ts* gene sequencing

|                                 |                                                |
|---------------------------------|------------------------------------------------|
| DhfrPfQS                        | 5' CTCGAGGAATTCGGATCCTATGATGGAACAAGTCTGCGAC    |
| DhfrPfCoasQ                     | 5' TCTAGAAAGCTTGGATCCTAAGCAGCCATATCCATTGAAATTT |
| dhfrsm13                        | 5' AACAGCTATGACCATGCCATATGTGCATGTTGTAA         |
| dhfrasm13                       | 5' GTAAAACGACGGCCAGTATTAAGCAGCCATATCCATTG      |
| internal primers for sequencing |                                                |
| DHb-2.b                         | 5' CTCGAGGAATTCGGATCC                          |
| DHg-1.g                         | 5' TCTAGAAAGCTTGGATCC                          |

### Microsatellites

|                |                       |
|----------------|-----------------------|
| -0.1kb dhfrts* |                       |
| DHFR0.3kb.F    | 5' ATTCCAACATTTTCAAGA |
| DHFR0.3kb.3R   | 5' GGCATAAATATCGAAAAC |
| DHFR0.3kb.RHEX | 5' TCCATCATAAAAAGGAGA |

### +0.5kb dhfrts\*\*

|             |                           |
|-------------|---------------------------|
| d106_8.F    | 5' TAAAGAAGGCATAATTTTCA   |
| DHFRp0.5R   | 5' ACTTTATATTTTTCATTGAG   |
| d106_8.RHEX | 5' CATTGAGATAAATAAGTGTTCA |

### -4.4kb dhfrts\*\*\*

|                |                          |
|----------------|--------------------------|
| DHFR4.4kb.3F   | 5' GTTGTCAATAATTTCTGCATC |
| DHFR4.4kb.R    | 5' CGATATATCTGATGGGTGA   |
| DHFR4.4kb.RHEX | 5'TACCATAGCAGTCTTTGCA    |

*Pfmsp1* block2

Universal primers

Fmsp1uf (106-125<sup>a</sup>) 5' GAAGATGCAGTATTGACAGG

Fmsp1ur (586-607<sup>a</sup>) 5' CATTAAATTTCTTCATATCCATC

Allelic specific primers

k1ff (161-183<sup>a</sup>) 5' ATGAAGAAGAAATTACTACAAAA

mad20ff (163-182<sup>b</sup>) 5' GAAGGAACAAGTGGAACAGC

ro33ff (174-193<sup>c</sup>) 5' TACTCAAGTTGTTGCAAAGC

\* locus also called 0.3kb primers from Roper et al, (2003) Lancet 361: 1174-1181

\*\* primers d106\_8.F and d106\_8.RHEX from Nair S et al (2003) Mol Biol Evol 20: 1526-1536  
DHFRp0.5R designed for this study

\*\*\* primers from Roper et al, (2003) Lancet 361: 1174-1181

<sup>a,b,c</sup> The *Pfmsp1* block2 positions are based on the reference strain Palo Alto-Uganda<sup>a</sup> (accession No M37213) for K1-type; MAD20<sup>b</sup> (accession No X05624) for MAD20-type and RO33Ghana<sup>c</sup> (accession No M35727) for RO33-type.
