# Supplementary material for: Rapid Dissemination of Plasmodium falciparum Drug Resistance Despite Strictly Controlled Antimalarial Use
Source: PubMed Central journal article supplement (PMC1764034; doi:10.1371/journal.pone.0000139), 2007-01-03
Supplement: pone.0000139.s002.pdf [file pone.0000139.s002.pdf]

**Supplementary file S2 *Pfcr1* intron 4 Microsatellite haplotypes**

| <i>Pfcr1</i> haplotype<br>code | <i>Pfcr1</i> intron 4<br>microsatellite<br>sequence |
|--------------------------------|-----------------------------------------------------|
| 1                              | (TAAA)2 (TA)14                                      |
| 2                              | (TAAA)2 (TA)15                                      |
| 3                              | (TAAA)2 (TA)16                                      |
| 4                              | (TAAA)2 (TA)23                                      |
| 5                              | (TAAA)2 (TA)24                                      |
| 6                              | (TAAA)3 (TA)7                                       |
| 7                              | (TAAA)3 (TA)9                                       |
| 8                              | (TAAA)3 (TA)10                                      |
| 9                              | (TAAA)3 (TA)11                                      |
| 10                             | (TAAA)3 (TA)12                                      |
| 11                             | (TAAA)3 (TA)13                                      |
| 12                             | (TAAA)3 (TA)14                                      |
| 13                             | (TAAA)3 (TA)15                                      |
| 14                             | (TAAA)3 (TA)16                                      |
| 15                             | (TAAA)3 (TA)17                                      |
| 16                             | (TAAA)3 (TA)18                                      |
| 17                             | (TAAA)3 (TA)19                                      |
| 18                             | (TAAA)3 (TA)20                                      |
| 19                             | (TAAA)3 (TA)21                                      |
| 20                             | (TAAA)3 (TA)22                                      |
| 21                             | (TAAA)3 (TA)24                                      |
| 22                             | (TAAA)4 (TA)7                                       |
| 23                             | (TAAA)4 (TA)8                                       |
| 24                             | (TAAA)4 (TA)10                                      |
| 25                             | (TAAA)4 (TA)11                                      |
| 26                             | (TAAA)4 (TA)14                                      |
| 27                             | (TAAA)4 (TA)15                                      |
| 28                             | (TAAA)4 (TA)20                                      |
| 29                             | (TAAA)4 (TA)21                                      |
| 30                             | (TAAA)4 (TA)22                                      |
| 31                             | (TAAA)4 (TA)23                                      |
