# Supplementary material for: Rapid Dissemination of Plasmodium falciparum Drug Resistance Despite Strictly Controlled Antimalarial Use
Source: PubMed Central journal article supplement (PMC1764034; doi:10.1371/journal.pone.0000139), 2007-01-03
Supplement: pone.0000139.s003.pdf [file pone.0000139.s003.pdf]

Supplementary File Table S3

**Pfdhfr flanking microsatellite haplotypes**

Individual haplotypes and corresponding codes are indicated. Note that for the -4.4kb locus was typed for a few isolates only and is undetermined except for haplotypes 9, 11, 16, 29, 36 and 41.

| Haplotype code | fragment length (bp) |                 |                 |
|----------------|----------------------|-----------------|-----------------|
|                | MS-4.4kb bp          | MS-0.1Kb        | MS+0.5kb        |
| 1              |                      | 87              | 91              |
| 2              |                      | 87              | 95              |
| 3              |                      | 87              | 97              |
| 4              |                      | 87              | 101             |
| 5              |                      | 87              | 103             |
| 6              |                      | 87              | 109             |
| 7              |                      | 89              | 97              |
| 8              |                      | 95              | 91              |
| 9              | 169                  | 95              | 95              |
| 10             |                      | 95              | 97              |
| 11             | 178                  | 95              | 103             |
| 12             |                      | 95              | 111             |
| 13             |                      | 97              | 101             |
| 14             |                      | 97              | 103             |
| 15             |                      | 99              | 91              |
| 16             | 180                  | 99              | 97              |
| 17             |                      | 99              | 99              |
| 18             |                      | 99              | 103             |
| 19             |                      | 99              | 107             |
| 20             |                      | 99              | 109             |
| 21             |                      | 99              | 111             |
| 22             |                      | 103             | 85              |
| 23             |                      | 103             | 93              |
| 24             |                      | 103             | 95              |
| 25             |                      | 103             | 101             |
| 26             |                      | 105             | 109             |
| 27             |                      | 107             | 89              |
| 28             |                      | 107             | 93              |
| 29             | 175                  | 107             | 105             |
| 30             |                      | 109             | 79              |
| 31             |                      | 109             | 93              |
| 32             |                      | 109             | 105             |
| 33             |                      | 111             | 85              |
| 34             |                      | 111             | 93              |
| 35             |                      | 111             | 95              |
| 36             | 175                  | 111             | 97              |
| 37             |                      | 111             | 103             |
| 38             |                      | 111             | 109             |
| 39             |                      | 114             | 103             |
| 40             |                      | 115             | 97              |
| 41             | 163                  | 118             | 97              |
| 42             |                      | 118             | 107             |
| 43             |                      | 122             | 103             |
| 44             |                      | 122             | 109             |
| controls       | <b>MS-4.4kb bp</b>   | <b>MS-0.1Kb</b> | <b>MS+0.5kb</b> |
| 3D7 predicted  | 208                  | 106             | 108             |
| 3D7 observed   | not detected         | 103             | 105             |
| FCC1           | 169                  | 103             | 95              |
